# Supplementary material for: Mechanistic study of the selective hydrogenation of carboxylic acid derivatives over supported rhenium catalysts
Source: Royal Society of Chemistry journal article supplement (doi:10.1039/c9cy01404g), 2019-01-01
Supplement: c9cy01404g1.pdf [file c9cy01404g1.pdf]

## SUPPORTING INFORMATION

### Mechanistic study of the selective hydrogenation of carboxylic acid derivatives over supported rhenium catalysts

Takashi Toyao,<sup>\*a,b</sup> Kah Wei Ting,<sup>a</sup> S. M. A. Hakim Siddiki,<sup>a</sup> Abeda. S. Touchy,<sup>a</sup> Wataru Onodera,<sup>a</sup> Zen Maeno,<sup>a</sup> Hiroko Ariga-Miwa,<sup>a</sup> Yasuharu Kanda,<sup>c</sup> Kiyotaka Asakura,<sup>a</sup> Ken-ichi Shimizu<sup>\*a,b</sup>

<sup>a</sup> Institute for Catalysis, Hokkaido University, N-21, W-10, Sapporo 001-0021, Japan

<sup>b</sup> Elements Strategy Initiative for Catalysts and Batteries, Kyoto University, Katsura, Kyoto 615-8520, Japan

<sup>c</sup> Applied Chemistry Research Unit, College of Environmental Technology, Graduate School of Engineering, Muroran Institute of Technology, 27-1 Mizumoto, Muroran 050-8585, Japan

## Supplementary results

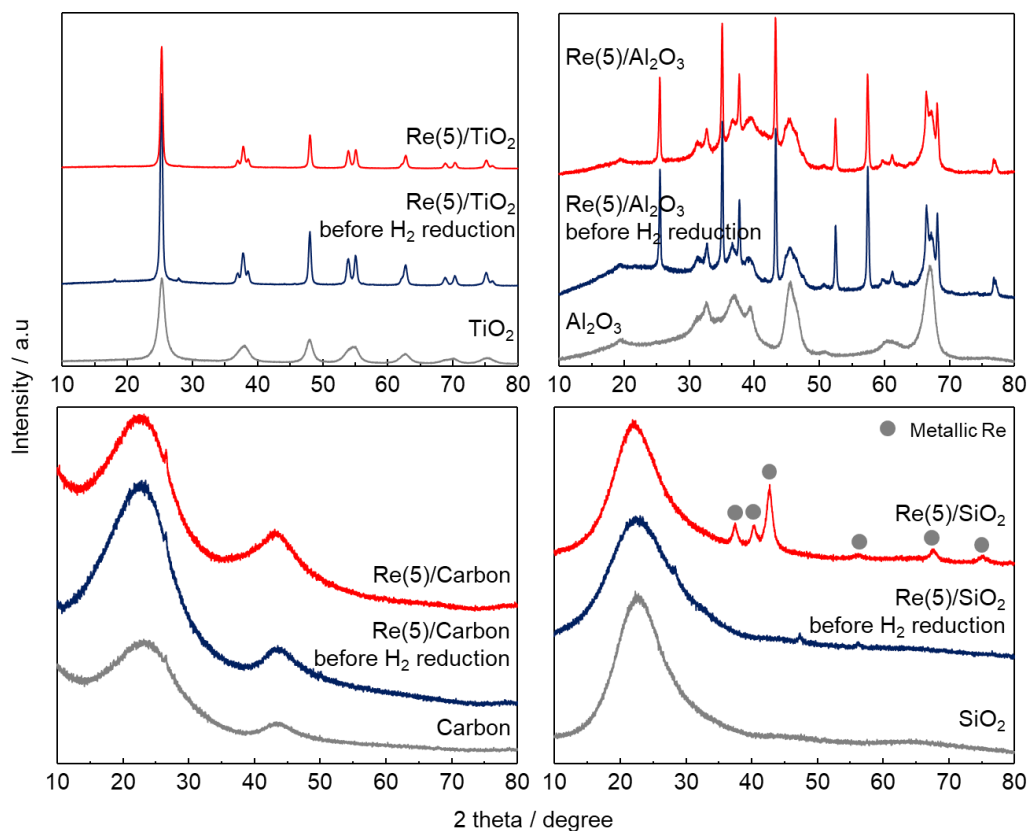

Figure S1. *Ex situ* XRD patterns of Re(5)/TiO<sub>2</sub>, Re(5)/SiO<sub>2</sub>, Re(5)/Al<sub>2</sub>O<sub>3</sub>, and Re/Carbon. The samples were reduced at  $T = 500$  °C under H<sub>2</sub> flow before the XRD measurements.

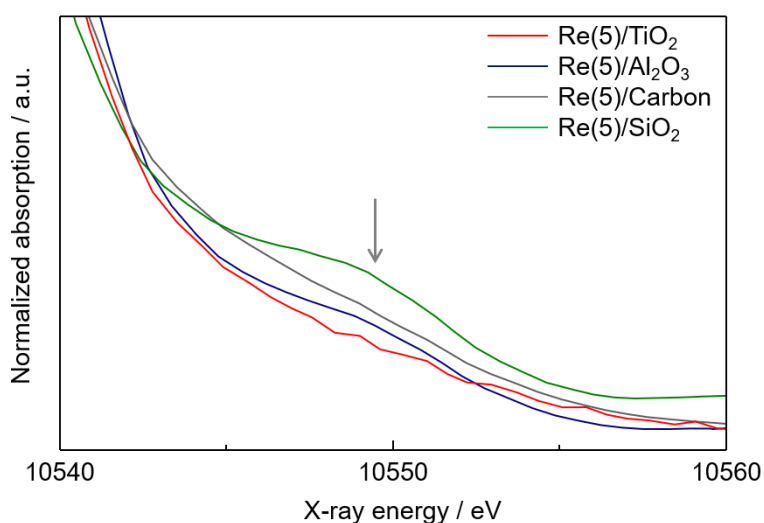

Figure S2. Zoomed *in situ* Re L<sub>3</sub>-edge XANES spectra of Re(5)/TiO<sub>2</sub>, Re(5)/Al<sub>2</sub>O<sub>3</sub>, Re(5)/Carbon, and Re(5)/SiO<sub>2</sub>. XANES spectra were measured at 500 °C under the flow of 5% H<sub>2</sub>/He (100 mL min<sup>-1</sup>).

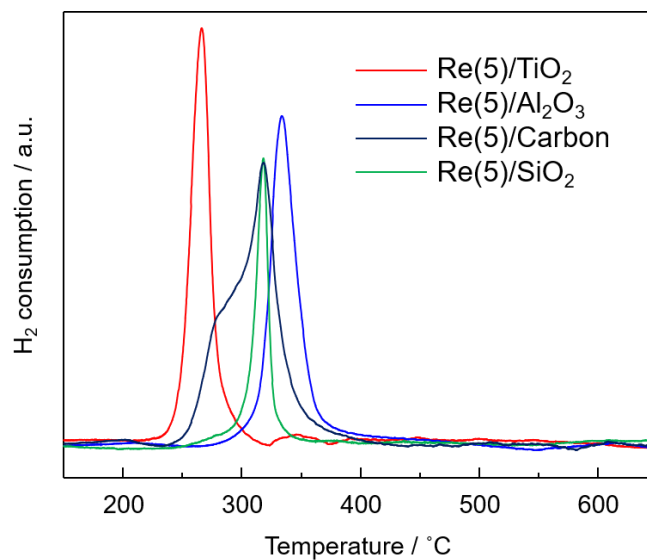

Figure S3. H<sub>2</sub>-TPR profile of Re(5)/TiO<sub>2</sub>, Re(5)/SiO<sub>2</sub>, and Re(5)/Al<sub>2</sub>O<sub>3</sub> after the calcination at 500 °C in air and of Re(5)/Carbon after the drying in air. The sample was heated with a temperature ramp-rate of 10 °C min<sup>-1</sup> in a flow of 5% H<sub>2</sub>/Ar (20 cm<sup>3</sup> min<sup>-1</sup>).

## Product Separation and NMR analysis

After the catalytic reaction, product mixtures were subjected to column chromatography on silica gel 60 (spherical, 63-210  $\mu\text{m}$ , Kanto Chemical Co. Ltd.; eluent: hexane/ethyl acetate = 90/10, v/v), and subsequently analyzed by GC and GCMS.  $^1\text{H}$  and  $^{13}\text{C}$  NMR analysis was carried out for those isolated products.  $^1\text{H}$  and  $^{13}\text{C}$  NMR spectra were recorded at ambient temperature on a JEOL-ECX 600 spectrometer ( $^1\text{H}$ : 600.17 MHz,  $^{13}\text{C}$ : 150.92 MHz), using tetramethylsilane as the internal standard.

$^1\text{H}$  and  $^{13}\text{C}$  NMR spectra for the desired products were assigned according to the corresponding literature values. Abbreviations used in the NMR experiments: s, singlet; d, doublet; dd, doublet of doublets; t, triplet; q, quartet; m, multiplet; br, broad. GC-MS spectra were recorded on a SHIMADZU QP2010.

### Butan-1-ol:<sup>1</sup>

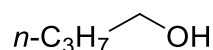

$^1\text{H}$  NMR (600.17 MHz,  $\text{CDCl}_3$ , TMS):  $\delta$  3.63 (s, 2H), 1.77 (br s, 1H), 1.58-1.52 (m, 2H), 1.42-1.33 (m, 2H), 0.92 (t,  $J = 6.87$  Hz, 3H);  $^{13}\text{C}$  NMR (150.92 MHz,  $\text{CDCl}_3$ )  $\delta$  62.59, 32.784, 18.42, 13.79; GC-MS m/e 74.10.

### Hexan-1-ol:<sup>2</sup>

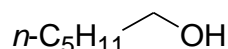

$^1\text{H}$  NMR (600.17 MHz,  $\text{CDCl}_3$ , TMS):  $\delta$  3.61 (t,  $J = 6.18$  Hz, 2H), 2.09 (br s, 1H), 1.57-1.54 (m, 2H), 1.32-1.30 (m, 6H), 0.89 (t,  $J = 6.87$  Hz, 3H);  $^{13}\text{C}$  NMR (150.92 MHz,  $\text{CDCl}_3$ )  $\delta$  62.83, 32.64, 31.58, 25.37, 22.56, 13.94; GC-MS m/e 102.15.

### Octan-1-ol:<sup>2</sup>

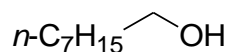

$^1\text{H}$  NMR (600.17 MHz,  $\text{CDCl}_3$ , TMS):  $\delta$  3.61 (t,  $J = 6.54$  Hz, 2H), 2.20 (br s, 1H), 1.56-1.53 (m, 2H), 1.33-1.28 (m, 10H), 0.88 (t,  $J = 6.83$  Hz, 3H);  $^{13}\text{C}$  NMR (150.92 MHz,  $\text{CDCl}_3$ )  $\delta$  62.82, 32.68, 31.77, 29.35, 29.23, 25.70, 22.59, 14.00; GC-MS m/e 130.14.

### Decan-1-ol:<sup>2</sup>

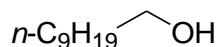

$^1\text{H}$  NMR (600.17 MHz,  $\text{CDCl}_3$ , TMS):  $\delta$  3.61 (t,  $J = 6.54$  Hz, 2H), 2.18 (br s, 1H), 1.56-1.54 (m, 2H), 1.31-1.26 (m, 14H), 0.88 (t,  $J = 6.87$  Hz, 3H);  $^{13}\text{C}$  NMR (150.92 MHz,  $\text{CDCl}_3$ )  $\delta$  62.82, 32.69, 31.84, 29.58, 29.51, 29.40, 29.27, 25.70, 22.61, 14.02; GC-MS m/e 158.18.

### Dodecan-1-ol:<sup>2</sup>

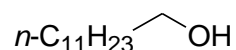

$^1\text{H}$  NMR (600.17 MHz,  $\text{CDCl}_3$ , TMS):  $\delta$  3.63 (t,  $J = 6.54$  Hz, 2H), 1.58-1.54 (m, 2H), 1.45 (br s, 1H), 1.35-1.25 (m, 18H), 0.88 (t,  $J = 6.87$  Hz, 3H);  $^{13}\text{C}$  NMR (150.92 MHz,  $\text{CDCl}_3$ )  $\delta$  63.03, 32.77, 31.89, 29.64, 29.61, 29.59, 29.58, 29.42, 29.32, 25.72, 22.66, 14.09; GC-MS m/e 186.20.

### Tetradecan-1-ol:<sup>2</sup>

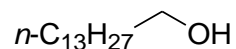

$^1\text{H}$  NMR (600.17 MHz,  $\text{CDCl}_3$ , TMS):  $\delta$  3.63 (t,  $J = 6.87$  Hz, 2H), 1.57-1.55 (m, 2H), 1.45 (br s, 1H), 1.37-1.25 (m, 22H), 0.88 (t,  $J = 6.87$  Hz, 3H), ;  $^{13}\text{C}$  NMR (150.92 MHz,  $\text{CDCl}_3$ )  $\delta$  63.06, 32.79, 31.90, 29.65 (C $\times$ 2), 29.60 (C $\times$ 2), 29.42 (C $\times$ 2), 29.35 (C $\times$ 2), 25.72, 22.68, 14.10; GC-MS m/e 214.25.

### Hexadecan-1-ol:<sup>2</sup>

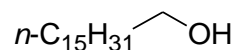

$^1\text{H}$  NMR (600.17 MHz,  $\text{CDCl}_3$ , TMS):  $\delta$  3.63 (t,  $J = 6.87$  Hz, 2H), 1.57-1.52 (m, 2H), 1.35-1.25 (m, 27H), 0.88 (t,  $J = 6.87$  Hz, 3H), ;  $^{13}\text{C}$  NMR (150.92 MHz,  $\text{CDCl}_3$ )  $\delta$  63.03, 32.79, 31.91, 29.68 (C $\times$ 2), 29.65 (C $\times$ 2), 29.60 (C $\times$ 2), 29.42 (C $\times$ 2), 29.35 (C $\times$ 2), 25.72, 22.68, 14.11; GC-MS m/e 242.28.

### Octadecan-1-ol:<sup>2</sup>

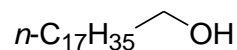

$^1\text{H}$  NMR (600.17 MHz,  $\text{CDCl}_3$ , TMS):  $\delta$  3.63 (t,  $J = 6.18$  Hz, 2H), 1.57-1.53 (m, 2H), 1.34-1.31 (m, 4H), 1.30-1.25 (m, 27H), 0.87 (t,  $J = 6.84$  Hz, 3H), ;  $^{13}\text{C}$  NMR (150.92 MHz,  $\text{CDCl}_3$ )  $\delta$  63.07, 32.80, 31.92, 29.69 (C $\times$ 4), 29.61 (C $\times$ 2), 29.43 (C $\times$ 4), 29.35 (C $\times$ 2), 25.72, 22.68, 14.11; GC-MS m/e 270.30.

## References

- 1 S. R. Wann, P. T. Thorsen and M. M. Kreevoy, *J. Org. Chem.*, 1981, **46**, 2579–2581.
- 2 T. Toyao, S. M. A. H. Siddiki, Y. Morita, T. Kamachi, A. S. Touchy, W. Onodera, K. Kon, S. Furukawa, H. Ariga, K. Asakura, K. Yoshizawa and K. Shimizu, *Chem. - A Eur. J.* 2017, **23**, 14848–14859.

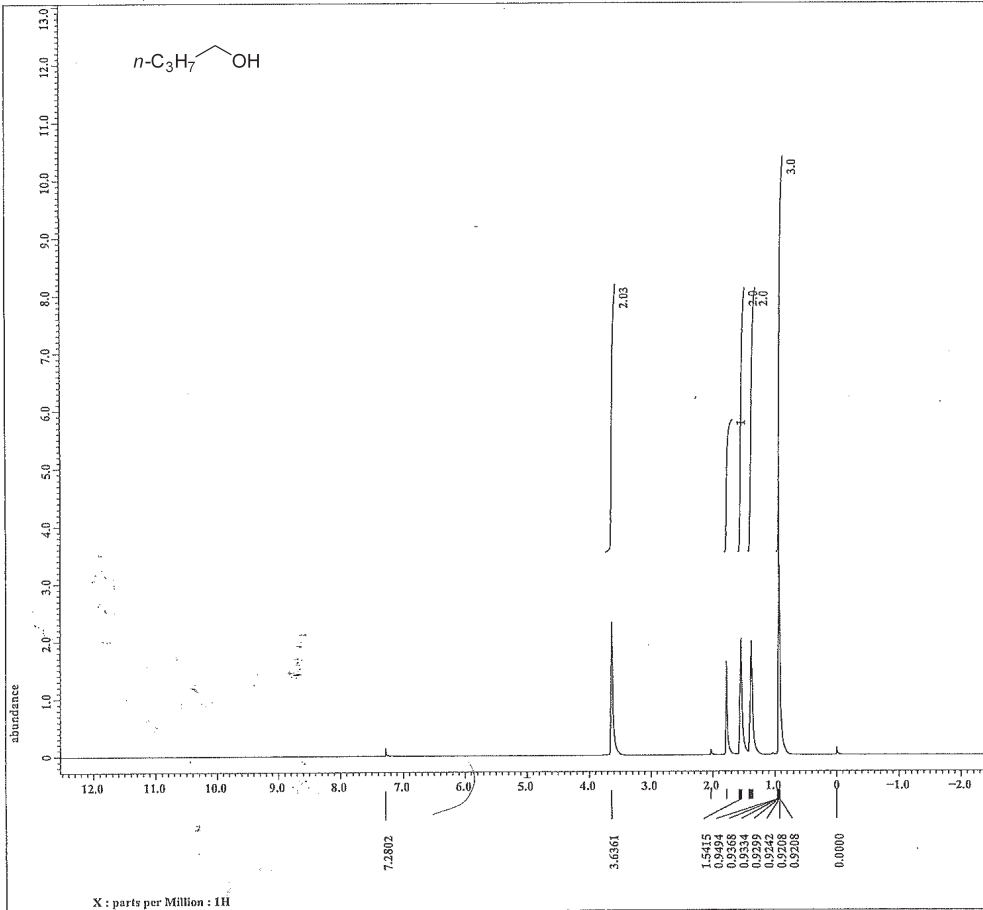

```

----- PROCESSING PARAMETERS -----
de_balance : 0 : FALSE
sweep : 0.2 [Hz] : 0.0 [s]
trapezoid3 : 0 [%] : 80 [%] : 100 [%]
zerofill : 1
fit : 1 : TRUE : TRUE
machinephase
ppm
Derived from: Exp-hakim-Butan-1-ol H-1.3

```

```

Filename      = Exp-hakim-Butan-1-ol
Author        = delta
Experiment    = single_pulse_ex2
Sample_id     = Exp-hakim-Butan-1-ol
Solvent       = CHLOROFORM-D
Creation_time = 22-MAR-2019 16:29:35
Revision_time = 22-MAR-2019 16:37:21
Current_line  = 22-MAR-2019 16:38:13

Comment       = Exp-hakim-Butan-1-ol
Data_format  = 1D_COMPLEX
Dim_size     = 13107
Dim_title    = 1H
Dim_units    = [ppm]
Dimensions   = X
Site         = ECA 600
Spectrometer = DELTA2_NMR

Field_strength = 14.09636928 [T] (600[M]
X_acq_duration = 1.4548992 [s]
X_domain       = 1H
X_freq        = 600.1723046 [MHz]
X_offset      = 5 [ppm]
X_points      = 16384
X_prescans    = 1
X_resolution   = 0.69733284 [Hz]
X_sweep       = 11.26126126 [kHz]
Irr_domain    = 1H
Irr_freq      = 600.1723046 [MHz]
Irr_offset    = 5 [ppm]
Tri_domain    = 1H
Tri_freq      = 600.1723046 [MHz]
Tri_offset    = 5 [ppm]
Clipped       = FALSE
Mod_return    = 1
Scans         = 8
Total_scans   = 8

X_90_width    = 13.17 [us]
X_acq_time    = 1.4548992 [s]
X_angle       = 45 [deg]
X_atn         = 3.4 [dB]
X_pulse       = 6.585 [us]
Irr_mode      = OFF
Tri_mode      = OFF
Dance_preset  = FALSE
Initial_wait  = 1 [s]
Recvr_gain    = 36
Relaxation_delay = 5 [s]
Repetition_time = 6.4548992 [s]
Temp_get      = 21.4 [dC]

```

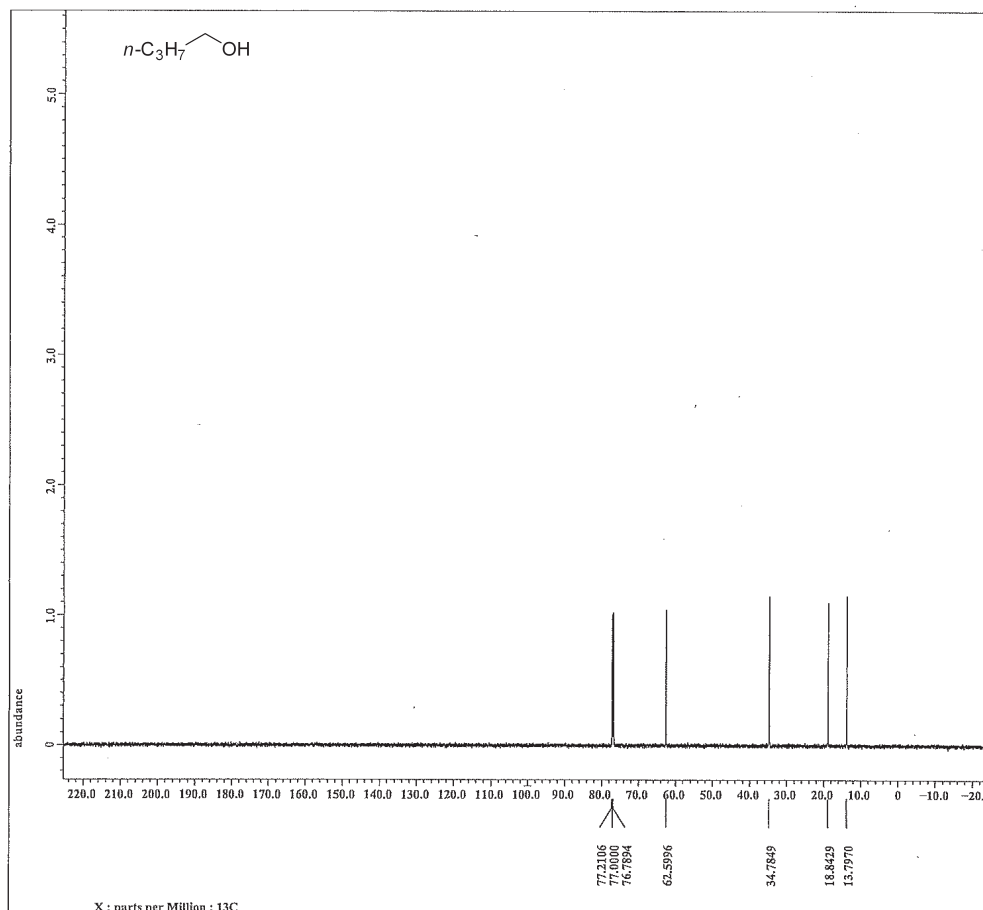

```

----- PROCESSING PARAMETERS -----
de_balance : 0 : FALSE
sweep : 2.0 [Hz] : 0.0 [s]
trapezoid3 : 0 [%] : 80 [%] : 100 [%]
zerofill : 1
fit : 1 : TRUE : TRUE
machinephase
ppm
Derived from: Exp-hakim-Butan-1-ol C-1.3

```

```

Filename      = Exp-hakim-Butan-1-ol
Author        = delta
Experiment    = single_pulse_dec
Sample_id     = Exp-hakim-Butan-1-ol
Solvent       = CHLOROFORM-D
Creation_time = 22-MAR-2019 16:37:38
Revision_time = 22-MAR-2019 16:42:01
Current_line  = 22-MAR-2019 16:42:36

Comment       = Exp-hakim-Butan-1-ol
Data_format  = 1D_COMPLEX
Dim_size     = 26214
Dim_title    = 13C
Dim_units    = [ppm]
Dimensions   = X
Site         = ECA 600
Spectrometer = DELTA2_NMR

Field_strength = 14.09636928 [T] (600[M]
X_acq_duration = 0.69206016 [s]
X_domain       = 13C
X_freq        = 150.91343039 [MHz]
X_offset      = 100 [ppm]
X_points      = 32768
X_prescans    = 4
X_resolution   = 1.44496109 [Hz]
X_sweep       = 47.34848485 [kHz]
Irr_domain    = 1H
Irr_freq      = 600.1723046 [MHz]
Irr_offset    = 5 [ppm]
Clipped       = FALSE
Mod_return    = 1
Scans         = 164
Total_scans   = 164

X_90_width    = 12.7 [us]
X_acq_time    = 0.69206016 [s]
X_angle       = 30 [deg]
X_atn         = 7.5 [dB]
X_pulse       = 4.23333333 [us]
Irr_atn_dec  = 18.62 [dB]
Irr_atn_noe  = 18.62 [dB]
Irr_noise    = WALTZ16
Decoupling    = TRUCK
Initial_wait  = 1 [s]
Noe           = TRUCK
Noe_time     = 2 [s]
Recvr_gain    = 60
Relaxation_delay = 2 [s]
Repetition_time = 2.69206016 [s]
Temp_get      = 22.1 [dC]

```

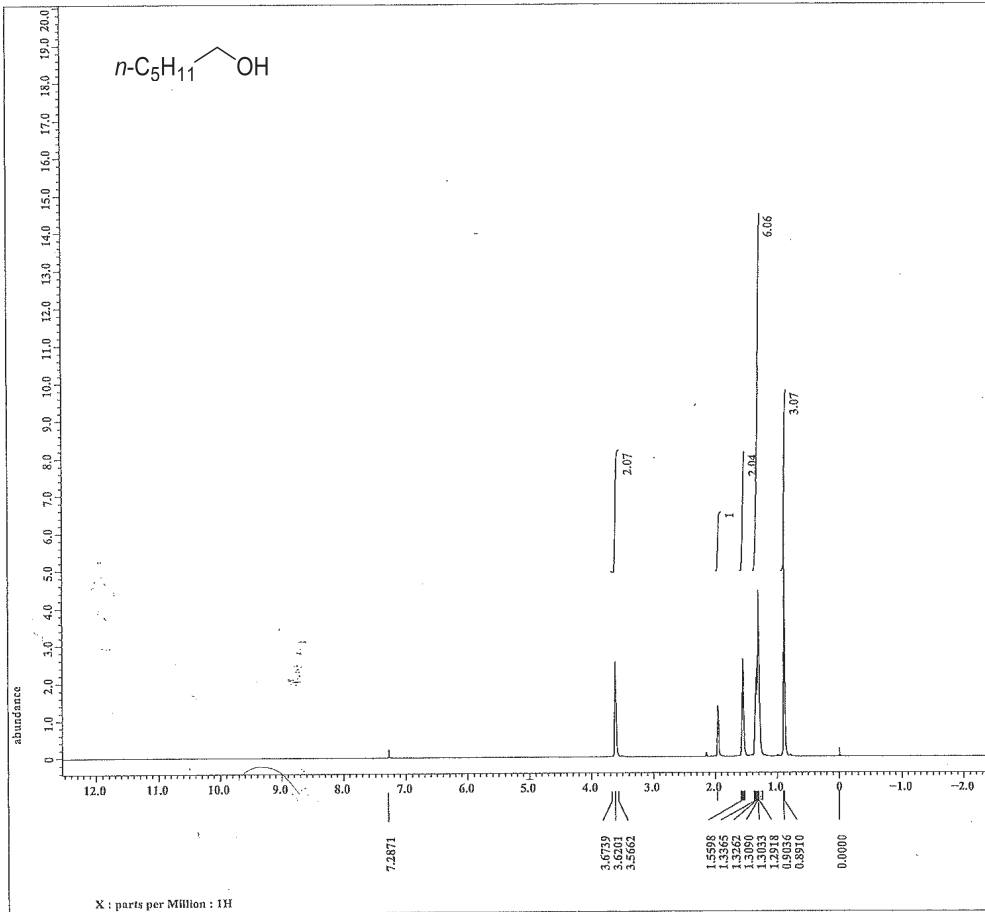

----- PROCESSING PARAMETERS -----  
 dc balance : 0 : FALSE  
 nuexp : 0.2 [Hz] : 0.0 [s]  
 trapezoid3 : 0 [%] : 80 [%] : 100 [%]  
 zerofill : 1  
 fft : 1 : TRUE : TRUE  
 machinephase  
 ppm  
 Derived from: Exp-hakim-Hexan-1-ol H-1.j

Filename = Exp-hakim-Hexan-1-ol  
 Author = delta  
 Experiment = single pulse.ex2  
 Sample id = Exp-hakim-Hexan-1-ol  
 Solvent = CHLOROFORM-D  
 Creation time = 22-MAR-2019 16:44:40  
 Revision time = 22-MAR-2019 16:51:43  
 Current time = 22-MAR-2019 16:52:08

Comment = Exp-hakim-Hexan-1-ol  
 Data format = 1D COMPLEX  
 Dim size = 13107  
 Dim title =  
 Dim units = [ppm]  
 Dimensions = X  
 Site = ECA 600  
 Spectrometer = DELTA2\_NMR

Field strength = 14.09636928 [T] (600 [M])  
 X\_acq\_duration = 1.4548992 [s]  
 X\_domain = 1H  
 X\_freq = 600.1723046 [MHz]  
 X\_offset = 5 [ppm]  
 X\_points = 16384  
 X\_prescans = 1  
 X\_resolution = 0.68733284 [Hz]  
 X\_sweep = 11.26126126 [kHz]  
 Irr\_domain = 1H  
 Irr\_freq = 600.1723046 [MHz]  
 Irr\_offset = 5 [ppm]  
 Tri\_domain = 1H  
 Tri\_freq = 600.1723046 [MHz]  
 Tri\_offset = 5 [ppm]  
 Clipped = FALSE  
 Mod\_return = 1  
 Scans = 8  
 Total\_scans = 8

X\_90\_width = 13.17 [us]  
 X\_acq\_time = 1.4548992 [s]  
 X\_angle = 45 [deg]  
 X\_atn = 3.4 [dB]  
 X\_pulse = 6.585 [us]  
 Irr\_mode = OFF  
 Tri\_mode = OFF  
 Dante\_preset = FALSE  
 Initial\_wait = 1 [s]  
 Recvr\_gain = 32  
 Relaxation\_delay = 5 [s]  
 Repetition\_time = 6.4548992 [s]  
 Temp\_get = 21.6 [dc]

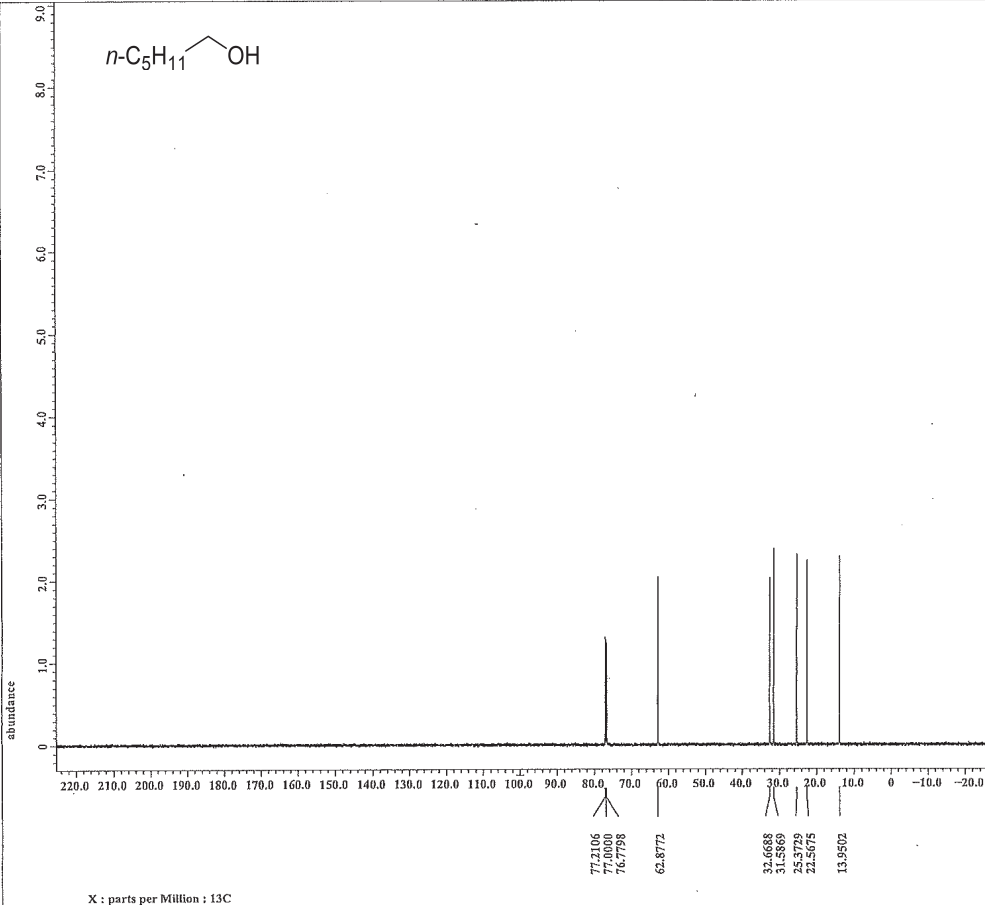

----- PROCESSING PARAMETERS -----  
 dc balance : 0 : FALSE  
 nuexp : 2.0 [Hz] : 0.0 [s]  
 trapezoid3 : 0 [%] : 80 [%] : 100 [%]  
 zerofill : 1  
 fft : 1 : TRUE : TRUE  
 machinephase  
 ppm  
 Derived from: Exp-hakim-Hexan-1-ol-C-1.j

Filename = Exp-hakim-Hexan-1-ol  
 Author = delta  
 Experiment = single pulse.doc  
 Sample id = Exp-hakim-Hexan-1-ol  
 Solvent = CHLOROFORM-D  
 Creation time = 22-MAR-2019 17:32:24  
 Revision time = 22-MAR-2019 17:39:11  
 Current time = 22-MAR-2019 17:39:59

Comment = Exp-hakim-Hexan-1-ol  
 Data format = 1D COMPLEX  
 Dim size = 26214  
 Dim title = 13C  
 Dim units = [ppm]  
 Dimensions = X  
 Site = ECA 600  
 Spectrometer = DELTA2\_NMR

Field strength = 14.09636928 [T] (600 [M])  
 X\_acq\_duration = 0.69206016 [s]  
 X\_domain = 13C  
 X\_freq = 150.91343039 [MHz]  
 X\_offset = 100 [ppm]  
 X\_points = 32768  
 X\_prescans = 4  
 X\_resolution = 1.44496109 [Hz]  
 X\_sweep = 47.34848485 [kHz]  
 Irr\_domain = 1H  
 Irr\_freq = 600.1723046 [MHz]  
 Irr\_offset = 5 [ppm]  
 Clipped = FALSE  
 Mod\_return = 1  
 Scans = 124  
 Total\_scans = 124

X\_90\_width = 12.7 [us]  
 X\_acq\_time = 0.69206016 [s]  
 X\_angle = 30 [deg]  
 X\_atn = 7.5 [dB]  
 X\_pulse = 4.23333333 [us]  
 Irr\_atn\_dec = 18.62 [dB]  
 Irr\_atn\_noe = 18.62 [dB]  
 Irr\_noe = WALTZ  
 Decoupling = TRUE  
 Initial\_wait = 1 [s]  
 Noe = TRUE  
 Noe time = 2 [s]  
 Recvr\_gain = 60  
 Relaxation\_delay = 2 [s]  
 Repetition\_time = 2.69206016 [s]  
 Temp\_get = 22.3 [dc]



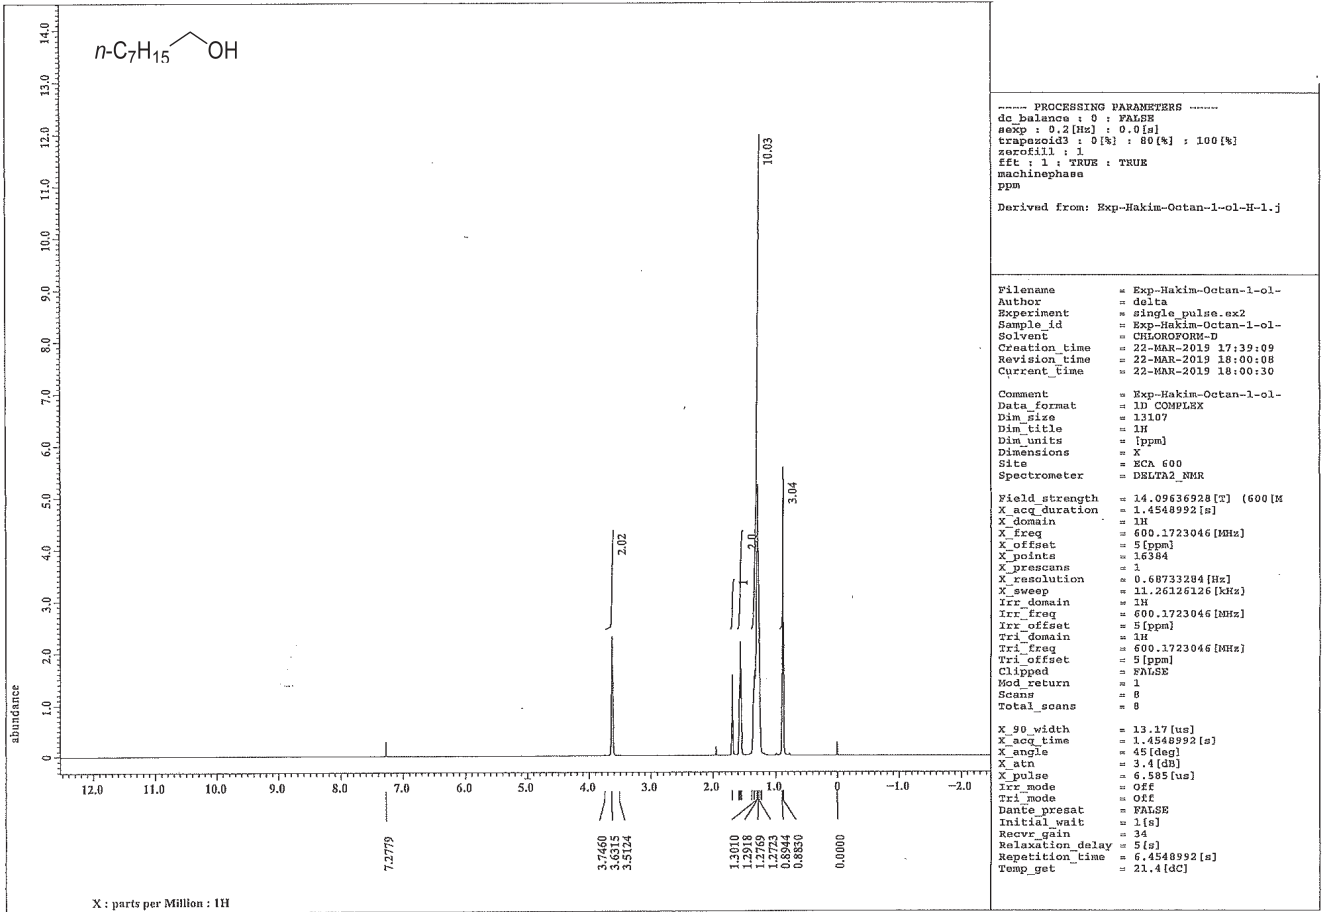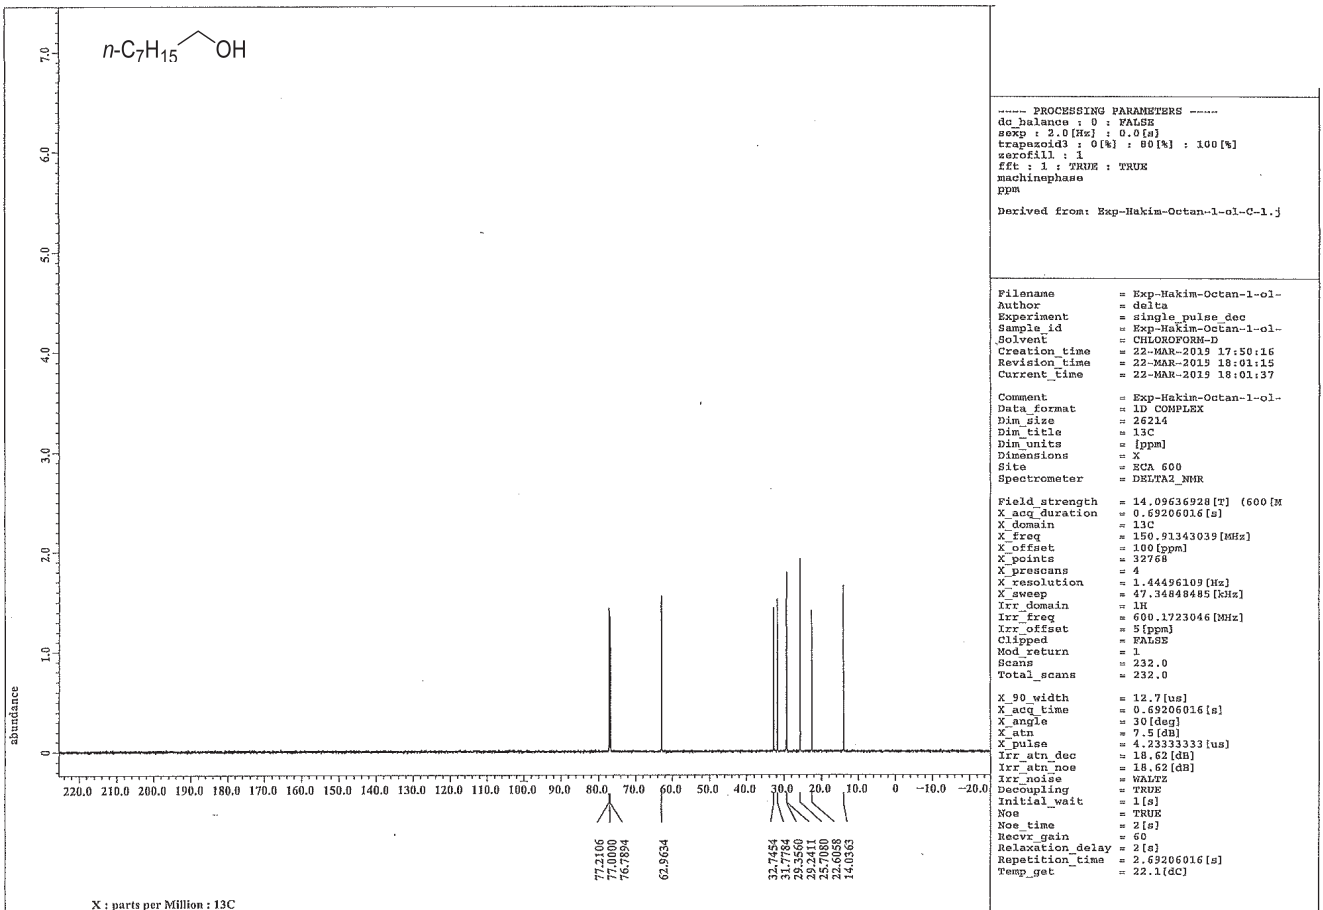

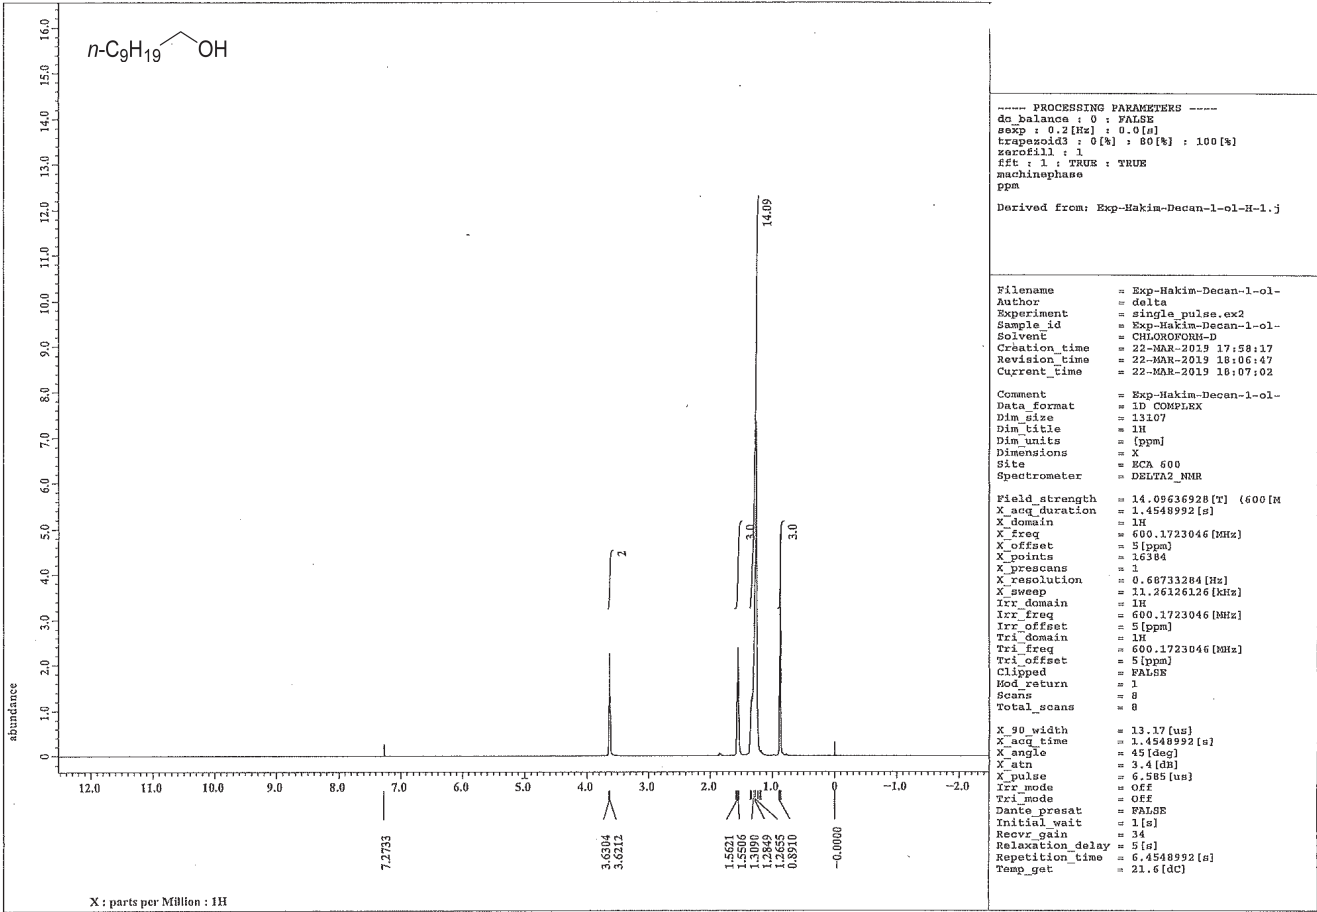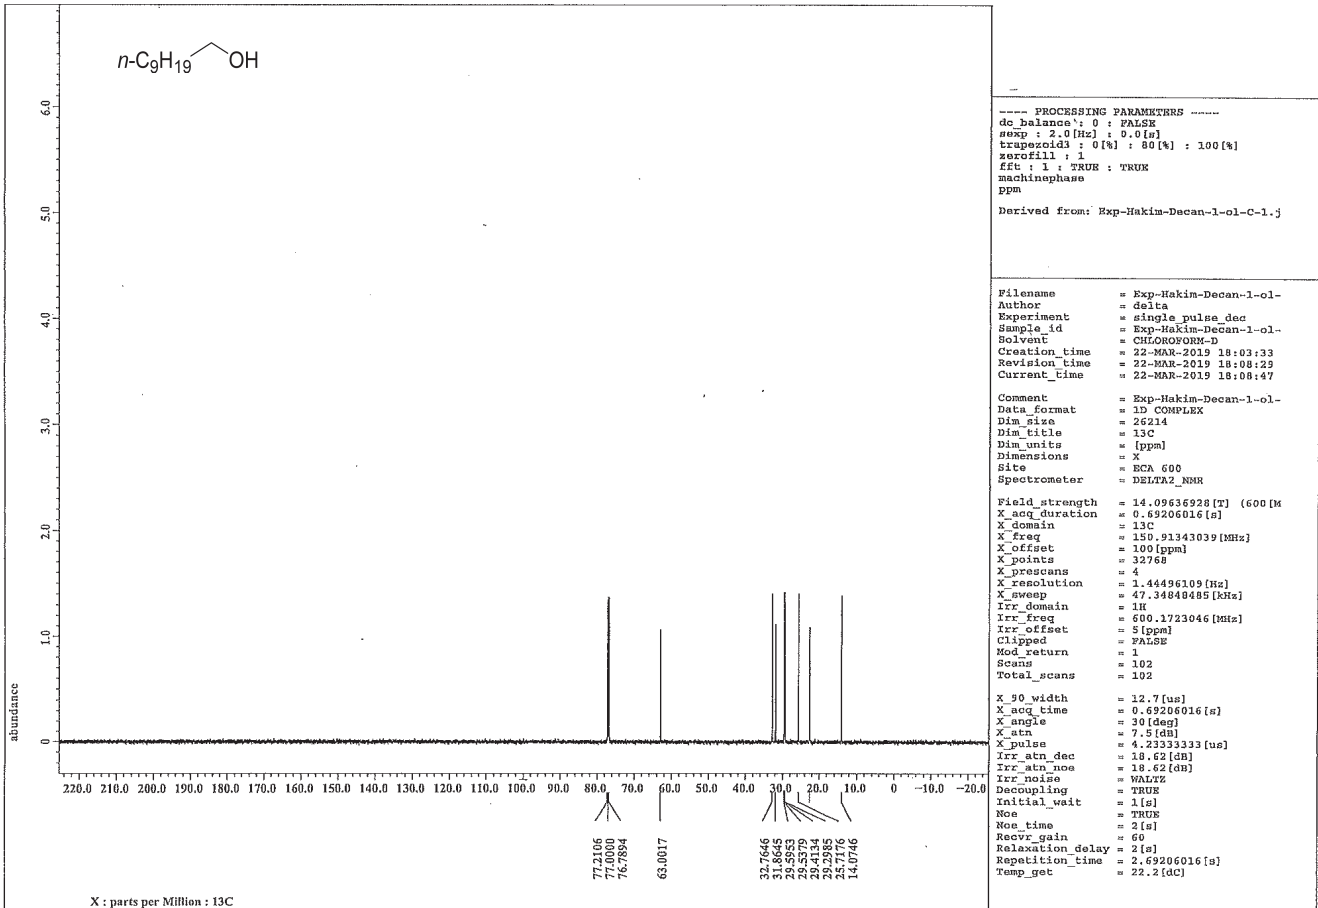

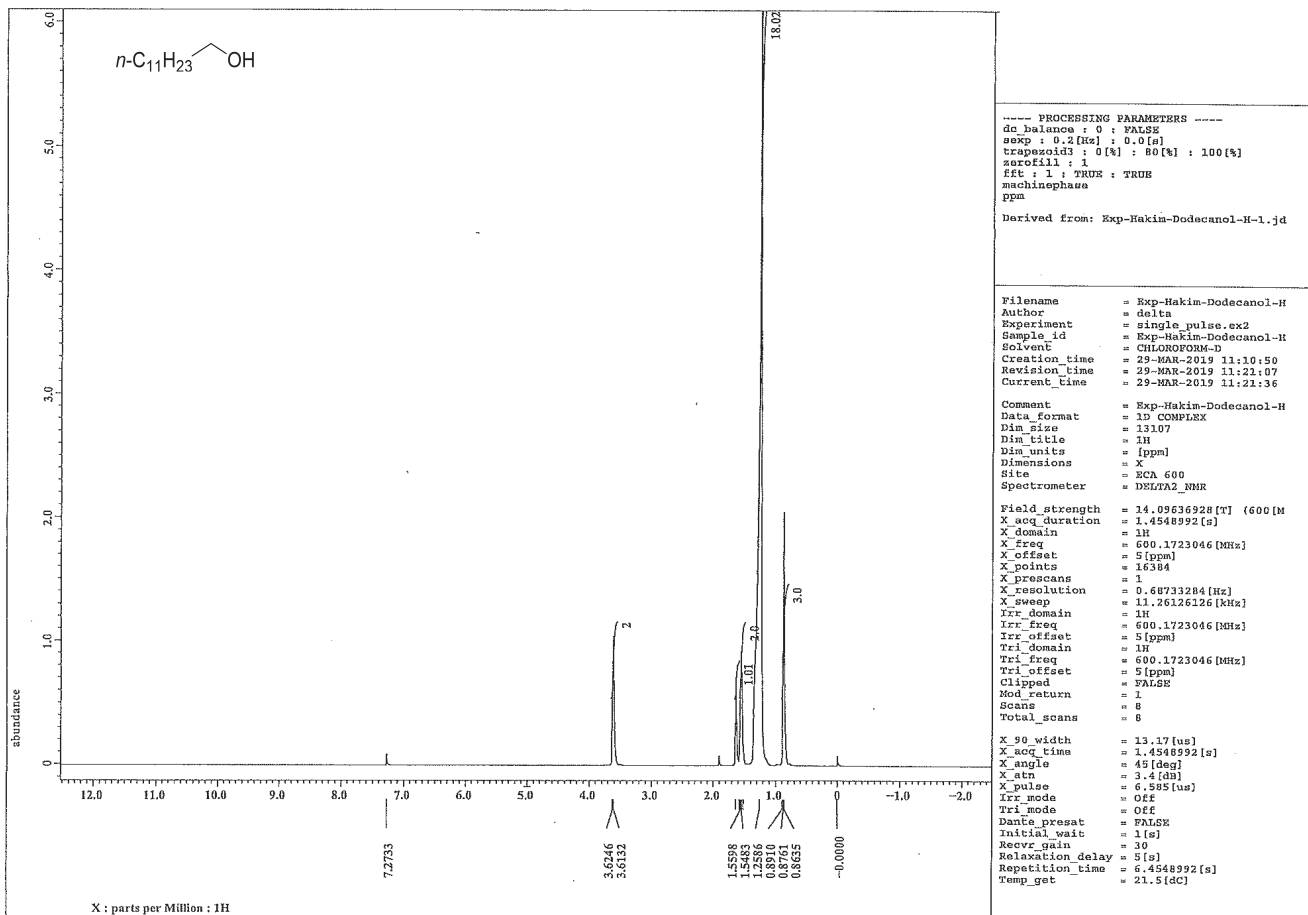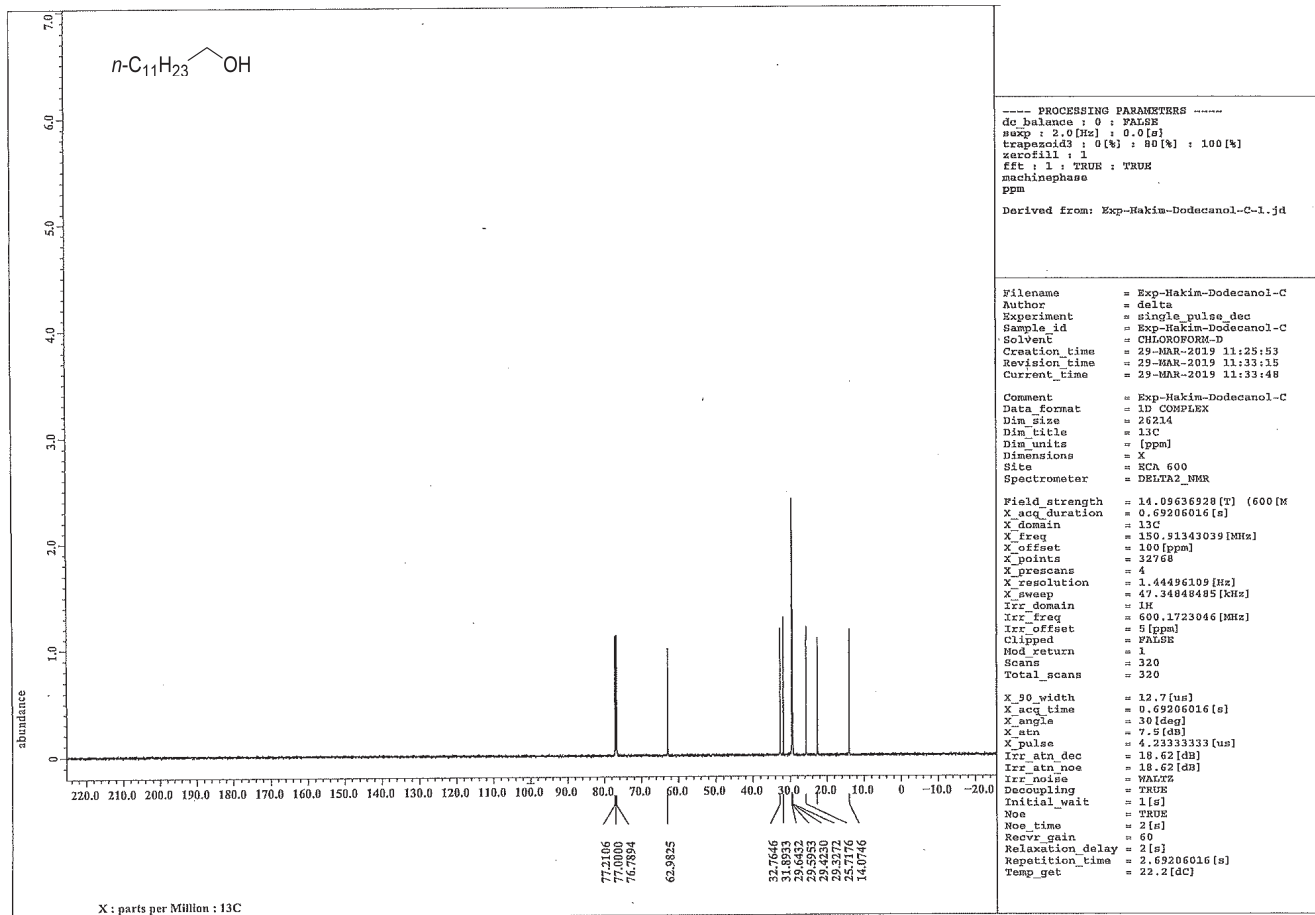

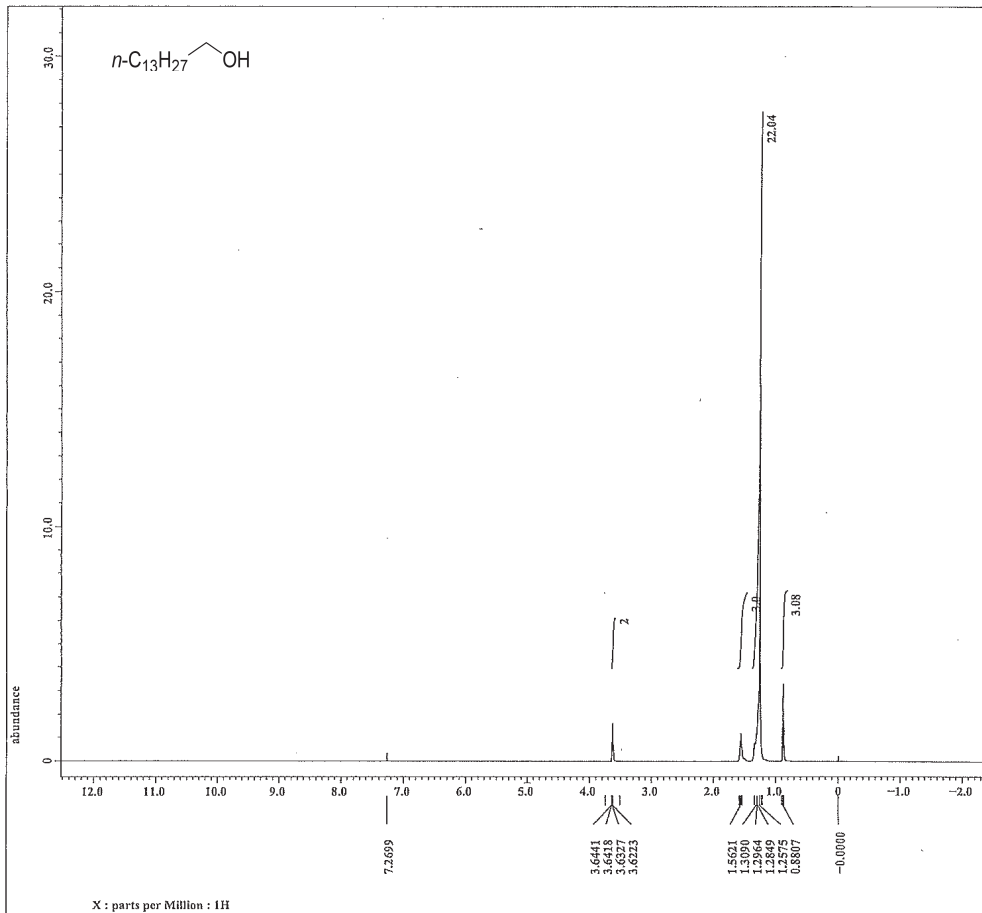

----- PROCESSING PARAMETERS -----  
 dc\_balance : 0 : FALSE  
 seqp : 0.2 [Hz] : 0.0 [Hz]  
 trapezoid3 : 0 [%] : 80 [%] : 100 [%]  
 zeroFill : 1  
 fit : 1 : TRUE : TRUE  
 machinphase  
 ppm  
 Derived from: Exp-Hakim-Tetradecanol-H-1

Filename = Exp-Hakim-Tetradecano  
 Author = delta  
 Experiment = single\_pulse.ex2  
 Sample\_id = Exp-Hakim-Tetradecano  
 Solvent = CHLOROFORM-D  
 Creation\_time = 29-MAR-2019 11:32:46  
 Revision\_time = 29-MAR-2019 11:53:45  
 Current\_time = 29-MAR-2019 11:54:26

Comment = Exp-Hakim-Tetradecano  
 Data\_format = 1D\_COMPLEX  
 Dim\_size = 23107  
 Dim\_title = 1H  
 Dim\_units = [ppm]  
 Dimensions = X  
 Site = ECA 600  
 Spectrometer = DELTA2\_NMR

Field\_strength = 14.09636928 [T] (600 [M]  
 X\_acq\_duration = 1.4548992 [s]  
 X\_domain = 1H  
 X\_freq = 600.1723046 [MHz]  
 X\_offset = 5 [ppm]  
 X\_points = 16384  
 X\_prescans = 1  
 X\_resolution = 0.68733284 [Hz]  
 X\_sweep = 11.26126126 [kHz]  
 Irr\_domain = 1H  
 Irr\_freq = 600.1723046 [MHz]  
 Irr\_offset = 5 [ppm]  
 Tri\_domain = 1H  
 Tri\_freq = 600.1723046 [MHz]  
 Tri\_offset = 5 [ppm]  
 Clipped = FALSE  
 Mod\_return = 1  
 Scans = 8  
 Total\_scans = 8

X\_90\_width = 13.17 [us]  
 X\_acq\_time = 1.4548992 [s]  
 X\_angle = 45 [deg]  
 X\_atn = 3.4 [dB]  
 X\_pulse = 6.585 [us]  
 Irr\_mode = Off  
 Tri\_mode = Off  
 Dante\_presat = FALSE  
 Initial\_wait = 1 [s]  
 Recvr\_gain = 30  
 Relaxation\_delay = 5 [s]  
 Repetition\_time = 6.4548992 [s]  
 Temp\_get = 21.6 [dC]

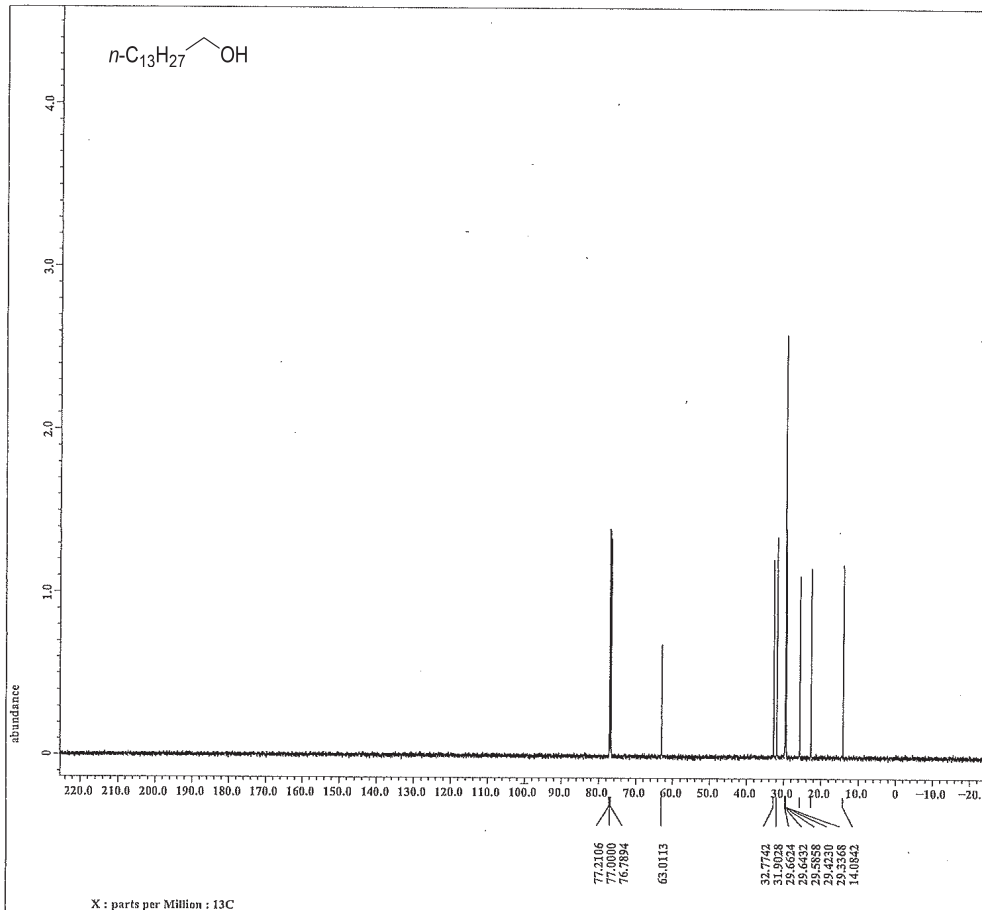

----- PROCESSING PARAMETERS -----  
 dc\_balance : 0 : FALSE  
 seqp : 2.0 [Hz] : 0.0 [Hz]  
 trapezoid3 : 0 [%] : 80 [%] : 100 [%]  
 zeroFill : 1  
 fit : 1 : TRUE : TRUE  
 machinphase  
 ppm  
 Derived from: Exp-Hakim-Tetradecanol-C-1

Filename = Exp-Hakim-Tetradecano  
 Author = delta  
 Experiment = single\_pulse\_dec  
 Sample\_id = Exp-Hakim-Tetradecano  
 Solvent = CHLOROFORM-D  
 Creation\_time = 29-MAR-2019 11:42:11  
 Revision\_time = 29-MAR-2019 11:49:01  
 Current\_time = 29-MAR-2019 11:49:28

Comment = Exp-Hakim-Tetradecano  
 Data\_format = 1D\_COMPLEX  
 Dim\_size = 24214  
 Dim\_title = 13C  
 Dim\_units = [ppm]  
 Dimensions = X  
 Site = ECA 600  
 Spectrometer = DELTA2\_NMR

Field\_strength = 14.09636928 [T] (600 [M]  
 X\_acq\_duration = 0.69206016 [s]  
 X\_domain = 13C  
 X\_freq = 150.91343039 [MHz]  
 X\_offset = 100 [ppm]  
 X\_points = 32768  
 X\_prescans = 4  
 X\_resolution = 1.44496309 [Hz]  
 X\_sweep = 47.34848485 [kHz]  
 Irr\_domain = 1H  
 Irr\_freq = 600.1723046 [MHz]  
 Irr\_offset = 5 [ppm]  
 Clipped = FALSE  
 Mod\_return = 1  
 Scans = 194  
 Total\_scans = 194

X\_90\_width = 12.7 [us]  
 X\_acq\_time = 0.69206016 [s]  
 X\_angle = 30 [deg]  
 X\_atn = 7.5 [dB]  
 X\_pulse = 4.23333333 [us]  
 Irr\_atn\_dec = 18.52 [dB]  
 Irr\_atn\_noe = 18.52 [dB]  
 Irr\_noise = WALTEZ  
 Decoupling = TRUE  
 Initial\_wait = 1 [s]  
 Noe = TRUE  
 Noe\_time = 2 [s]  
 Recvr\_gain = 60  
 Relaxation\_delay = 2 [s]  
 Repetition\_time = 2.69206016 [s]  
 Temp\_get = 22.1 [dC]

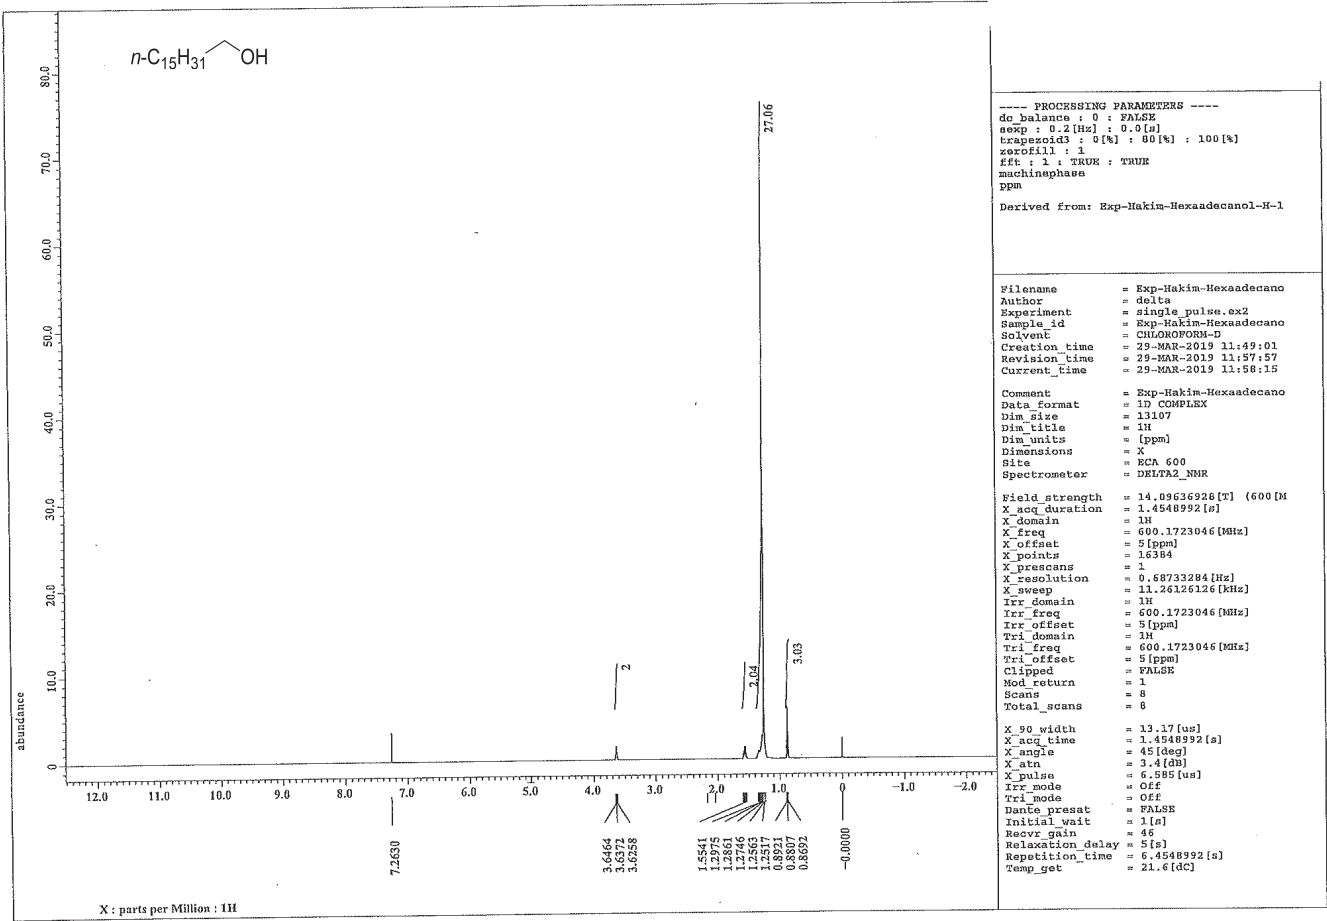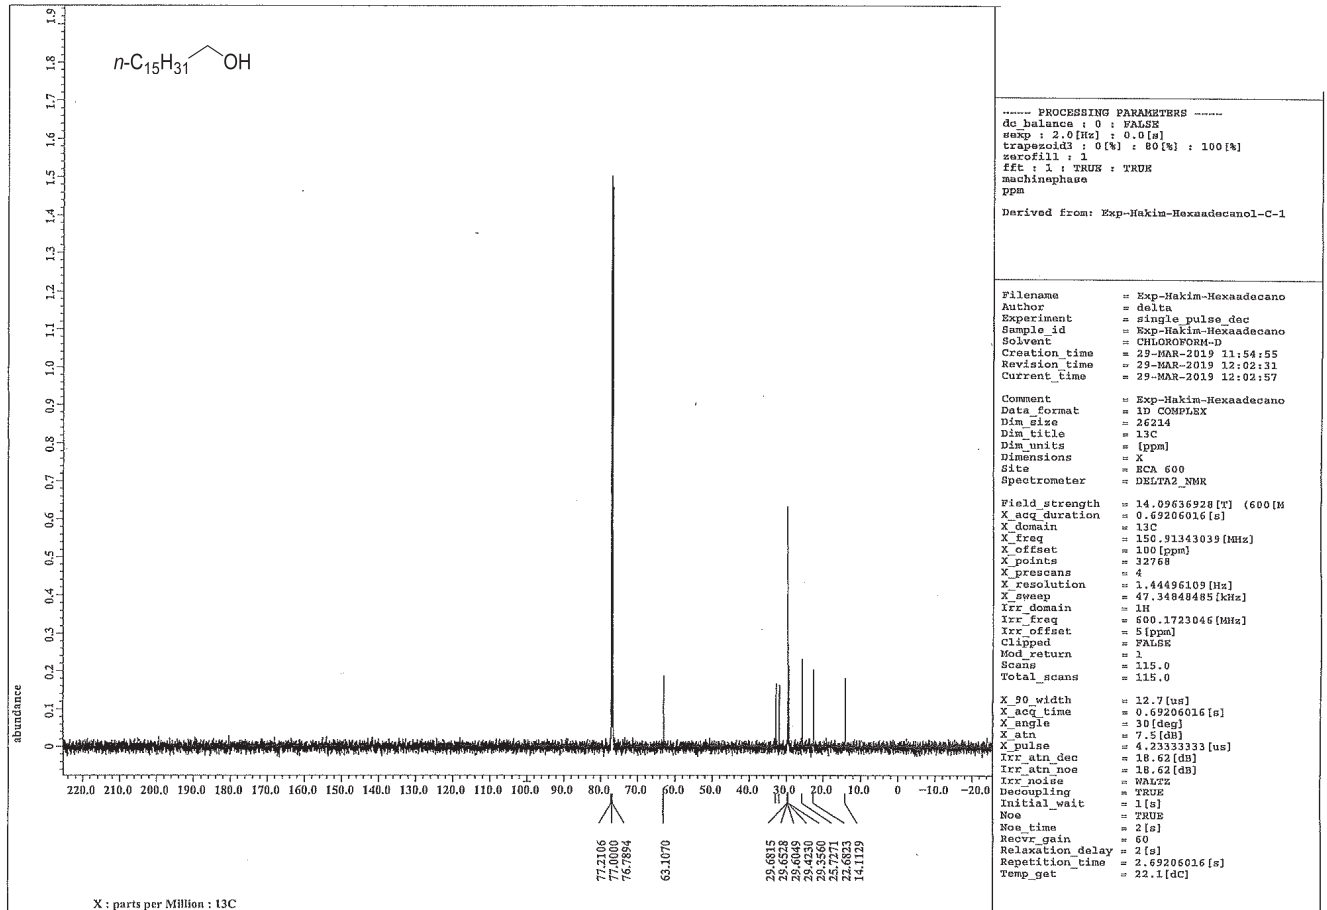

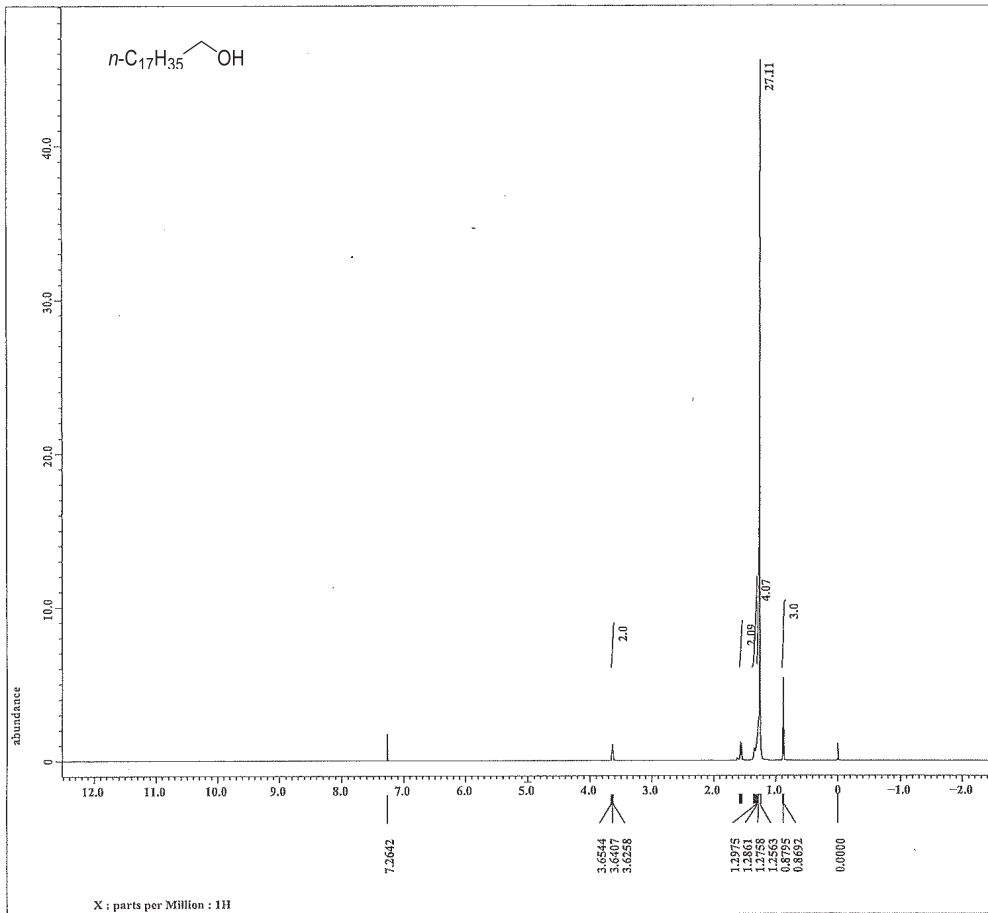

```

----- PROCESSING PARAMETERS -----
dc balance : 0 : FALSE
sweep : 0.2 [Hz] : 0.0 [s]
trapezoid3 : 0 [%] : 80 [%] : 100 [%]
zerofill : 1
fft : 1 : TRUE : TRUE
machinphase
ppm
Derived from: Exp-Hakim-Octadecanol-H-1.

Filename = Exp-Hakim-Octadecanol
Author = delta
Experiment = single_pulse.ex2
Sample_id = Exp-Hakim-Octadecanol
Solvent = CHLOROFORM-D
Creation time = 29-MAR-2019 12:01:45
Revision time = 29-MAR-2019 12:15:26
Current_time = 29-MAR-2019 12:15:41

Comment = Exp-Hakim-Octadecanol
Data format = 1D COMPLEX
Dim size = 13107
Dim title = 1H
Dim units = [ppm]
Dimensions = X
Site = ECA 600
Spectrometer = DELTA2_NMR

Field strength = 14.09636928 [T] (600[M]
X_acq_duration = 1.4548992 [s]
X_domain = 1H
X_freq = 600.1723046 [MHz]
X_offset = 5 [ppm]
X_points = 16384
X_prescans = 1
X_resolution = 0.68733284 [Hz]
X_sweep = 11.26126126 [kHz]
Irr_domain = 1H
Irr_freq = 600.1723046 [MHz]
Irr_offset = 5 [ppm]
Tri_domain = 1H
Tri_freq = 600.1723046 [MHz]
Tri_offset = 5 [ppm]
Clipped = FALSE
Mod_return = 1
Scans = 8
Total_scans = 8

X_90_width = 13.17 [us]
X_acq_time = 1.4548992 [s]
X_angle = 45 [deg]
X_atn = 3.4 [dB]
X_pulse = 6.585 [us]
Irr_mode = Off
Tri_mode = Off
Pants_presat = FALSE
Initial_wait = 1 [s]
Recvr_gain = 40
Relaxation_delay = 5 [s]
Repetition_time = 6.4548992 [s]
Temp_get = 23.4 [dC]

```

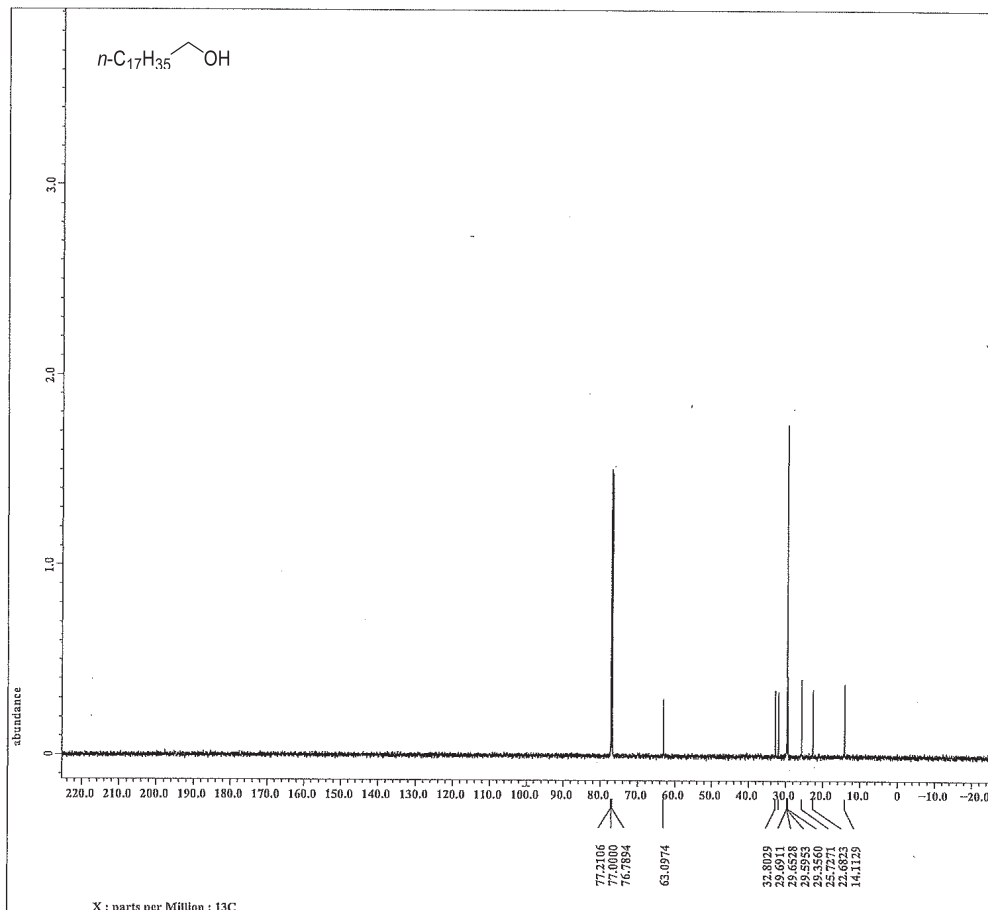

```

----- PROCESSING PARAMETERS -----
dc balance : 0 : FALSE
sweep : 2.0 [Hz] : 0.0 [s]
trapezoid3 : 0 [%] : 80 [%] : 100 [%]
zerofill : 1
fft : 1 : TRUE : TRUE
machinphase
ppm
Derived from: Exp-Hakim-Octadecanol-C-1.

Filename = Exp-Hakim-Octadecanol
Author = delta
Experiment = single_pulse_dec
Sample_id = Exp-Hakim-Octadecanol
Solvent = CHLOROFORM-D
Creation time = 29-MAR-2019 12:12:00
Revision time = 29-MAR-2019 12:16:56
Current_time = 29-MAR-2019 12:17:29

Comment = Exp-Hakim-Octadecanol
Data format = 1D COMPLEX
Dim size = 24224
Dim title = 13C
Dim units = [ppm]
Dimensions = X
Site = ECA 600
Spectrometer = DELTA2_NMR

Field strength = 14.09636928 [T] (600[M]
X_acq_duration = 0.69206016 [s]
X_domain = 13C
X_freq = 150.91343039 [MHz]
X_offset = 100 [ppm]
X_points = 32768
X_prescans = 4
X_resolution = 1.44496109 [Hz]
X_sweep = 47.34848485 [kHz]
Irr_domain = 1H
Irr_freq = 600.1723046 [MHz]
Irr_offset = 5 [ppm]
Clipped = FALSE
Mod_return = 1
Scans = 213
Total_scans = 213

X_90_width = 12.7 [us]
X_acq_time = 0.69206016 [s]
X_angle = 30 [deg]
X_atn = 7.5 [dB]
X_pulse = 4.2333333 [us]
Irr_atn_dec = 18.62 [dB]
Irr_atn_noe = 18.62 [dB]
Irr_noise = WALI22
Decoupling = TRUE
Initial_wait = 1 [s]
Noe = TRUE
Noe_time = 2 [s]
Recvr_gain = 60
Relaxation_delay = 2 [s]
Repetition_time = 2.69206016 [s]
Temp_get = 22.1 [dC]

```
